# Supplementary material for: Gradual transition from mosaic to global DNA methylation patterns during deuterostome evolution
Source: PubMed Central journal article supplement (PMC2957685; doi:10.1186/1471-2105-11-s7-s2), 2010-10-15
Supplement: 1471-2105-11-S7-S2-S1.pdf [file 1471-2105-11-S7-S2-S1.pdf]

Table S1. The genomic coordinates and their methylation status by the ascidian DNA methylation analysis

| UCSC ci2 | Start   | End     | Methylated | CpG score |
|----------|---------|---------|------------|-----------|
| chr04q   | 3184251 | 3186250 | 0          | 0.937     |
| chr04q   | 3205251 | 3207250 | 0          | 0.925     |
| chr04q   | 3222501 | 3224500 | 1          | 0.507     |
| chr04q   | 3243251 | 3245250 | 0          | 0.900     |
| chr04q   | 3249001 | 3251000 | 0          | 1.063     |
| chr04q   | 3258751 | 3260750 | 0          | 0.816     |
| chr04q   | 3305001 | 3307000 | 0          | 1.238     |
| chr04q   | 3349501 | 3351500 | 0          | 1.253     |
| chr04q   | 3357751 | 3359750 | 1          | 0.469     |
| chr04q   | 3375751 | 3377750 | 0          | NA        |
| chr04q   | 3385501 | 3387500 | 1          | 0.903     |
| chr04q   | 3389751 | 3391750 | 0          | 1.289     |
| chr04q   | 3402001 | 3404000 | 1          | NA        |
| chr04q   | 3412751 | 3414750 | 0          | 1.011     |
| chr04q   | 3419001 | 3421000 | 1          | 0.406     |
| chr04q   | 3454251 | 3456250 | 1          | NA        |
| chr04q   | 3478001 | 3480000 | 1          | 0.424     |
| chr04q   | 3494251 | 3496250 | 0          | 0.882     |
| chr04q   | 3513001 | 3515000 | 0          | 1.019     |
| chr04q   | 3523251 | 3525250 | 1          | 0.515     |
| chr04q   | 3533751 | 3535750 | 0          | 0.849     |
| chr04q   | 3540751 | 3542750 | 1          | 0.748     |
| chr04q   | 3547501 | 3549500 | 0          | 1.131     |
| chr04q   | 3560251 | 3562250 | 1          | 0.404     |
| chr04q   | 3573001 | 3575000 | 0          | 0.864     |
| chr04q   | 3581751 | 3583750 | 1          | 0.671     |
| chr04q   | 3586001 | 3588000 | 1          | 0.685     |
| chr04q   | 3596001 | 3598000 | 0          | 1.157     |
| chr04q   | 3612251 | 3614250 | 0          | 0.887     |

|        |         |         |   |       |
|--------|---------|---------|---|-------|
| chr04q | 3619251 | 3621250 | 0 | NA    |
| chr04q | 3624251 | 3626250 | 0 | 1.071 |
| chr04q | 3634001 | 3636000 | 1 | 0.388 |
| chr04q | 3640251 | 3642250 | 0 | 0.683 |
| chr04q | 3644001 | 3646000 | 0 | 1.317 |
| chr04q | 3654251 | 3656250 | 1 | 0.572 |
| chr04q | 3662001 | 3664000 | 0 | 1.108 |
| chr04q | 3671001 | 3673000 | 1 | 0.383 |
| chr04q | 3679501 | 3681500 | 1 | 0.554 |
| chr04q | 3690001 | 3692000 | 0 | 0.977 |
| chr04q | 3714001 | 3716000 | 0 | 1.142 |
| chr04q | 3740501 | 3742500 | 0 | 0.901 |
| chr04q | 3745501 | 3747500 | 1 | 0.344 |
| chr04q | 3754501 | 3756500 | 1 | 0.534 |
| chr04q | 3760751 | 3762750 | 0 | NA    |
| chr04q | 3769001 | 3771000 | 1 | 0.442 |
| chr04q | 3774251 | 3776250 | 0 | 1.131 |
| chr04q | 3789251 | 3791250 | 1 | 0.624 |
| chr04q | 3857251 | 3859250 | 0 | 0.980 |
| chr04q | 3859751 | 3861750 | 1 | 0.632 |
| chr04q | 3887751 | 3889750 | 0 | 1.216 |
| chr04q | 3917251 | 3919250 | 1 | 0.512 |
| chr04q | 3945751 | 3947750 | 1 | 0.371 |
| chr04q | 3951501 | 3953500 | 0 | 1.191 |
| chr04q | 3962001 | 3964000 | 1 | 0.432 |
| chr04q | 3968001 | 3970000 | 0 | NA    |
| chr04q | 3971251 | 3973250 | 1 | 0.636 |
| chr04q | 3979501 | 3981500 | 0 | 0.949 |
| chr04q | 3990001 | 3992000 | 1 | 0.471 |
| chr04q | 3996001 | 3998000 | 0 | 1.225 |
| chr04q | 4003001 | 4005000 | 1 | 0.423 |
| chr04q | 4008751 | 4010750 | 0 | 0.838 |
| chr04q | 4019001 | 4021000 | 1 | 0.498 |

|        |         |         |   |       |
|--------|---------|---------|---|-------|
| chr04q | 4043251 | 4045250 | 0 | NA    |
| chr04q | 4047001 | 4049000 | 1 | NA    |
| chr04q | 4062251 | 4064250 | 0 | 1.066 |
| chr04q | 4072751 | 4074750 | 0 | 0.824 |
| chr04q | 4098751 | 4100750 | 1 | 0.362 |
| chr04q | 4113501 | 4115500 | 0 | 1.089 |
| chr04q | 4120251 | 4122250 | 1 | 0.318 |
| chr04q | 4140251 | 4142250 | 0 | 0.604 |
| chr07q | 8001    | 10000   | 1 | 0.533 |
| chr07q | 17251   | 19250   | 1 | NA    |
| chr07q | 26001   | 28000   | 1 | 0.570 |
| chr07q | 38251   | 40250   | 1 | 1.285 |
| chr07q | 68501   | 70500   | 0 | NA    |
| chr07q | 101251  | 103250  | 1 | 1.019 |
| chr07q | 134251  | 136250  | 0 | NA    |
| chr07q | 142251  | 144250  | 1 | 0.580 |
| chr07q | 153251  | 155250  | 1 | 0.579 |
| chr07q | 164251  | 166250  | 1 | 0.399 |
| chr07q | 168251  | 170250  | 0 | 1.142 |
| chr07q | 176251  | 178250  | 1 | 0.481 |
| chr07q | 182501  | 184500  | 0 | 1.384 |
| chr07q | 188251  | 190250  | 1 | 0.529 |
| chr07q | 208501  | 210500  | 1 | 0.453 |
| chr07q | 239001  | 241000  | 0 | 0.671 |
| chr07q | 240251  | 242250  | 1 | 0.376 |
| chr07q | 249501  | 251500  | 1 | 1.007 |
| chr07q | 281501  | 283500  | 1 | 0.584 |
| chr07q | 294001  | 296000  | 0 | 1.042 |
| chr07q | 323251  | 325250  | 0 | 0.894 |
| chr07q | 333001  | 335000  | 1 | 0.695 |
| chr07q | 335251  | 337250  | 0 | 1.067 |
| chr07q | 338001  | 340000  | 1 | 0.563 |
| chr07q | 346001  | 348000  | 0 | 1.308 |

|        |        |        |   |       |
|--------|--------|--------|---|-------|
| chr07q | 377001 | 379000 | 0 | 1.156 |
| chr07q | 391001 | 393000 | 1 | 0.753 |
| chr07q | 416501 | 418500 | 1 | 0.493 |
| chr07q | 449751 | 451750 | 0 | 0.958 |
| chr07q | 481251 | 483250 | 0 | 1.249 |
| chr07q | 500001 | 502000 | 1 | 0.580 |
| chr07q | 518501 | 520500 | 1 | 0.536 |
| chr07q | 536501 | 538500 | 1 | 0.472 |
| chr07q | 547501 | 549500 | 0 | 0.760 |
| chr07q | 547501 | 549500 | 1 | 0.760 |
| chr07q | 558751 | 560750 | 1 | 0.591 |
| chr07q | 562501 | 564500 | 0 | 0.712 |
| chr07q | 583501 | 585500 | 1 | 0.378 |
| chr07q | 592251 | 594250 | 0 | 0.944 |
| chr07q | 602751 | 604750 | 1 | 0.842 |
| chr07q | 639251 | 641250 | 0 | 1.113 |
| chr07q | 653001 | 655000 | 1 | 0.524 |
| chr07q | 666251 | 668250 | 1 | 0.311 |
| chr07q | 679751 | 681750 | 1 | 0.527 |
| chr07q | 682501 | 684500 | 0 | 0.923 |
| chr07q | 694001 | 696000 | 1 | 0.506 |
| chr07q | 711251 | 713250 | 0 | 0.899 |
| chr07q | 724501 | 726500 | 0 | 0.759 |
| chr07q | 747501 | 749500 | 0 | NA    |
| chr07q | 823251 | 825250 | 1 | 0.490 |
| chr07q | 837751 | 839750 | 0 | 1.224 |
| chr07q | 860251 | 862250 | 0 | 0.853 |
| chr07q | 881251 | 883250 | 1 | 0.626 |
| chr07q | 914501 | 916500 | 1 | 0.718 |
| chr07q | 920751 | 922750 | 0 | NA    |
| chr07q | 934001 | 936000 | 1 | 0.609 |
